# Supplementary material for: Effect of MnO2 Crystal Type on the Oxidation of Furfural to Furoic Acid
Source: MDPI journal article supplement (doi:10.3390/catal13040663), 2023-03-28
Supplement: s1 [file s1]

Supplementary Material

*This PDF file includes:*

*Table s1. BET data for different crystalline MnO<sub>2</sub>.*

*Table s2. JCPDS main peaks data of different crystalline MnO<sub>2</sub>*

*Figure s1. XPS S 2p binding energy of MnO<sub>2</sub> with different crystal types.*

*Figure s2. Ex situ DRIFTS spectra of pure furfural.*

*Figure s3. Reactor for the oxidation of furfural to furoic acid.*

**Table s1** BET data for different crystalline MnO<sub>2</sub>.

| Catalyst                   | Pore size | Pore volume | BET surface area |
|----------------------------|-----------|-------------|------------------|
| $\alpha$ -MnO <sub>2</sub> | 11.719    | 0.298       | 100.171          |
| $\beta$ -MnO <sub>2</sub>  | /         | /           | /                |
| $\gamma$ -MnO <sub>2</sub> | 10.434    | 0.240       | 94.184           |
| $\delta$ -MnO <sub>2</sub> | 11.755    | 0.037       | 11.083           |

The results show that the BET surface area of  $\delta$ -MnO<sub>2</sub> is smaller compared to the  $\alpha$ -MnO<sub>2</sub> and  $\gamma$ -MnO<sub>2</sub>, (where  $\beta$ -MnO<sub>2</sub> cannot be measured because the specific surface is too small) indicating that the surface area is not the reason for the excellent performance of  $\delta$ -MnO<sub>2</sub>.

**Table s2** JCPDS main peaks data of different crystalline MnO<sub>2</sub>.

| Catalyst                   | JCPDS Card No. | Three Main Peaks/° |       |       |
|----------------------------|----------------|--------------------|-------|-------|
| $\alpha$ -MnO <sub>2</sub> | 44-0141        | 12.78              | 18.10 | 37.52 |
| $\beta$ -MnO <sub>2</sub>  | 24-0735        | 28.68              | 37.33 | 56.65 |
| $\gamma$ -MnO <sub>2</sub> | 14-0644        | 22.43              | 37.12 | 56.14 |
| $\delta$ -MnO <sub>2</sub> | 80-1098        | 12.55              | 25.24 | 39.60 |

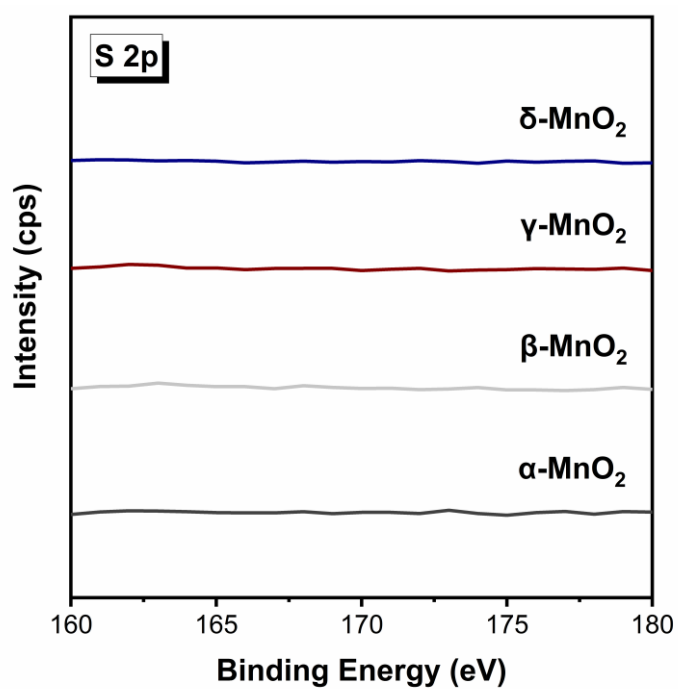

**Figure s1.** XPS S 2p binding energy of MnO<sub>2</sub> with different crystal types.

We characterized the content of SO<sub>4</sub><sup>2-</sup> in different crystalline forms of MnO<sub>2</sub> using XPS S 2p (see Fig. r-2). The results show that the S 2p peaks (Near 164 eV) are almost non-existent, indicating that the catalyst is scrubbed clean of SO<sub>4</sub><sup>2-</sup>. This excludes the influence of SO<sub>4</sub><sup>2-</sup> on the reaction.

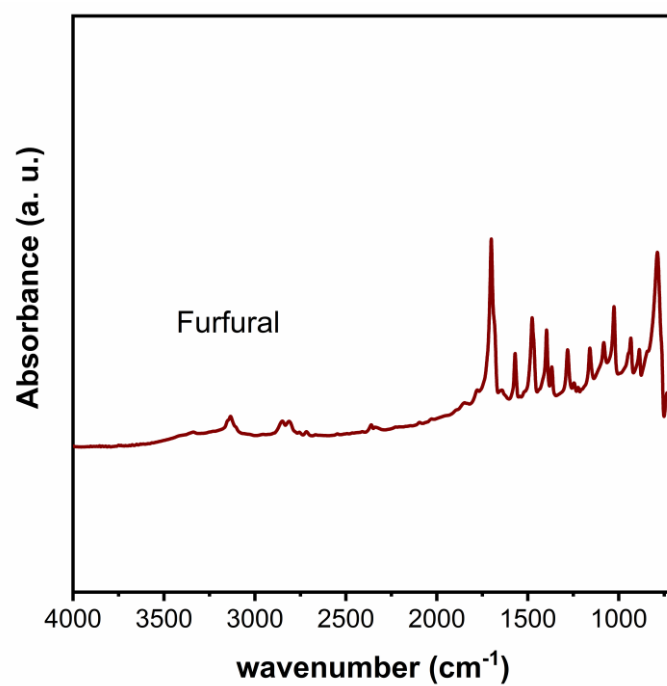

**Figure s2.** Ex situ DRIFTS spectra of pure furfural.

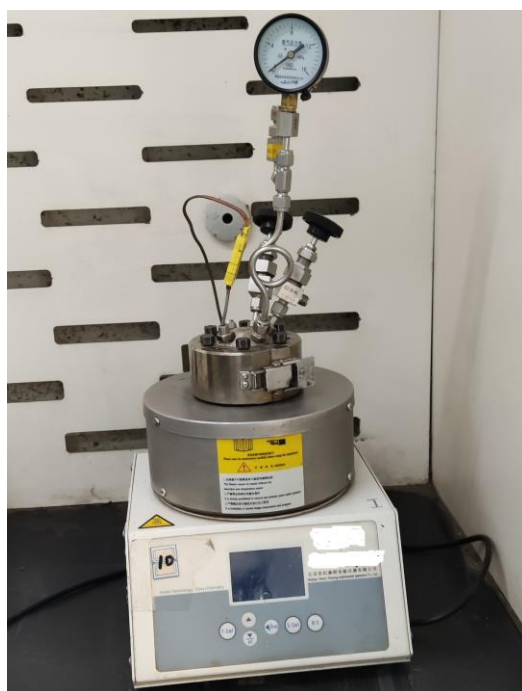

**Figure s3.** Reactor for the oxidation of furfural to furoic acid.
